# Supplementary material for: Impact of the Front-of-Pack Label Nutri-Score on the Nutritional Quality of Food Choices in a Quasi-Experimental Trial in Catering
Source: MDPI journal article supplement (doi:10.3390/nu13124530), 2021-12-17
Supplement: s1 [file s1]

Table S1 Nutri-Score associated with a number of food products from the Nutri-Score catering trial

| Food product                    | Nutri-Score                                                                          |
|---------------------------------|--------------------------------------------------------------------------------------|
| Ratatouille                     |   |
| Vegetables and mushroom risotto |   |
| Salmon tartar                   |   |
| Gratin Dauphinois               |   |
| Crème caramel                   |   |
| Lemon mousse with biscuit       |   |
| Chocolate cake                  |  |

Figure S1 Point attribution and allocation to the Nutri-Score based on the nutritional composition of the food

| 1. Attribution of points. based on the content of nutrients and other elements per 100 g of a food/beverage |                                           |            |                                 |            |                            |                          |             |  |                                 |                                     |                 |           |             |
|-------------------------------------------------------------------------------------------------------------|-------------------------------------------|------------|---------------------------------|------------|----------------------------|--------------------------|-------------|--|---------------------------------|-------------------------------------|-----------------|-----------|-------------|
| Points A                                                                                                    |                                           |            | Specific cut-offs:<br>Beverages |            | Specific cut-offs:<br>Fats |                          |             |  | Specific cut-offs:<br>Beverages |                                     | Points C        |           |             |
| Points                                                                                                      | Energy (kJ)                               | Sugars (g) | Energy (kJ)                     | Sugars (g) | Saturated fat (g)          | Saturated fat/Lipids (%) | Sodium (mg) |  | Points                          | Fruits. veg (%)                     | Fruits. veg (%) | Fiber (g) | Protein (g) |
| 0                                                                                                           | ≤ 335                                     | ≤ 4.5      | ≤ 0                             | ≤ 0        | ≤ 1                        | < 10                     | ≤ 90        |  | 0                               | ≤ 40                                | ≤ 40            | ≤ 0.9     | ≤ 1.6       |
| 1                                                                                                           | > 335                                     | > 4.5      | ≤ 30                            | ≤ 1.5      | > 1                        | < 16                     | > 90        |  | 1                               | > 40                                |                 | > 0.9     | > 1.6       |
| 2                                                                                                           | > 670                                     | > 9        | ≤ 60                            | ≤ 3        | > 2                        | < 22                     | > 180       |  | 2                               | > 60                                | >40             | > 1.9     | > 3.2       |
| 3                                                                                                           | > 1005                                    | > 13.5     | ≤ 90                            | ≤ 4.5      | > 3                        | < 28                     | > 270       |  | 3                               | -                                   |                 | > 2.8     | > 4.8       |
| 4                                                                                                           | > 1340                                    | > 18       | ≤ 120                           | ≤ 6        | > 4                        | < 34                     | > 360       |  | 4                               | -                                   | > 60            | > 3.7     | > 6.4       |
| 5                                                                                                           | > 1675                                    | > 22.5     | ≤ 150                           | ≤ 7.5      | > 5                        | < 40                     | > 450       |  | 5                               | > 80                                |                 | > 4.7     | > 8.0       |
| 6                                                                                                           | > 2010                                    | > 27       | ≤ 180                           | ≤ 9        | > 6                        | < 46                     | > 540       |  | 6                               |                                     |                 |           |             |
| 7                                                                                                           | > 2345                                    | > 31       | ≤ 210                           | ≤ 10.5     | > 7                        | < 52                     | > 630       |  | 7                               |                                     |                 |           |             |
| 8                                                                                                           | > 2680                                    | > 36       | ≤ 240                           | ≤ 12       | > 8                        | < 58                     | > 720       |  | 8                               |                                     |                 |           |             |
| 9                                                                                                           | > 3015                                    | > 40       | ≤ 270                           | ≤ 13.5     | > 9                        | < 64                     | > 810       |  | 9                               |                                     |                 |           |             |
| 10                                                                                                          | > 3350                                    | > 45       | > 270                           | > 13.5     | > 10                       | ≥ 64                     | > 900       |  | 10                              |                                     | > 80            |           |             |
|                                                                                                             | 0-10 (a)                                  | 0-10 (b)   | 0-10 (a)                        | 0-10 (b)   | 0-10 (c)                   | 0-10 (c)                 | 0-10 (d)    |  |                                 | 0-5 (a)                             | 0-10 (a)        | 0-5 (b)   | 0-5 (c)     |
| Total                                                                                                       | Points A = (a) + (b) + (c) + (d) [0 – 40] |            |                                 |            |                            |                          |             |  | Total                           | Points C = (a) + (b) + (c) [0 – 15] |                 |           |             |

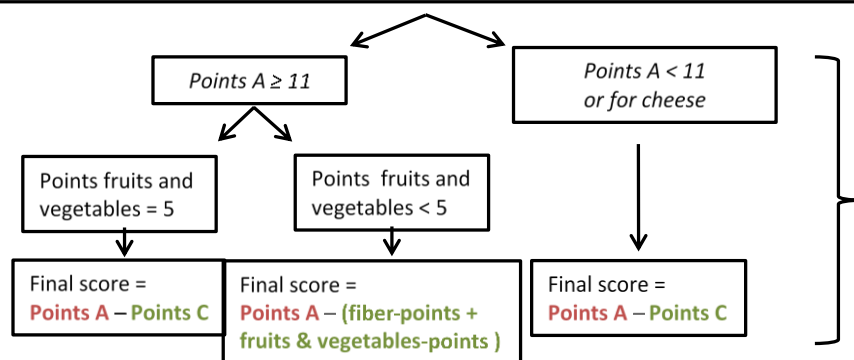

2. Final score: -15 to 40 points.

### 3. Attribution of colors:

| Foods (points) | Beverages (points) | Color        |
|----------------|--------------------|--------------|
| Min to -1      | Water              | Dark green   |
| 0 to 2         | Min to 1           | Light green  |
| 3 to 10        | 2 to 5             | Yellow       |
| 11 to 18       | 6 to 9             | Light Orange |
| 19 to Max      | 10 to Max          | Dark orange  |

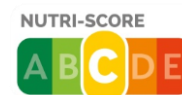

Green: highest quality

Red: lowest quality

Figure S2 Graphical representation of the effects modelled in the main analysis – mixed effects models

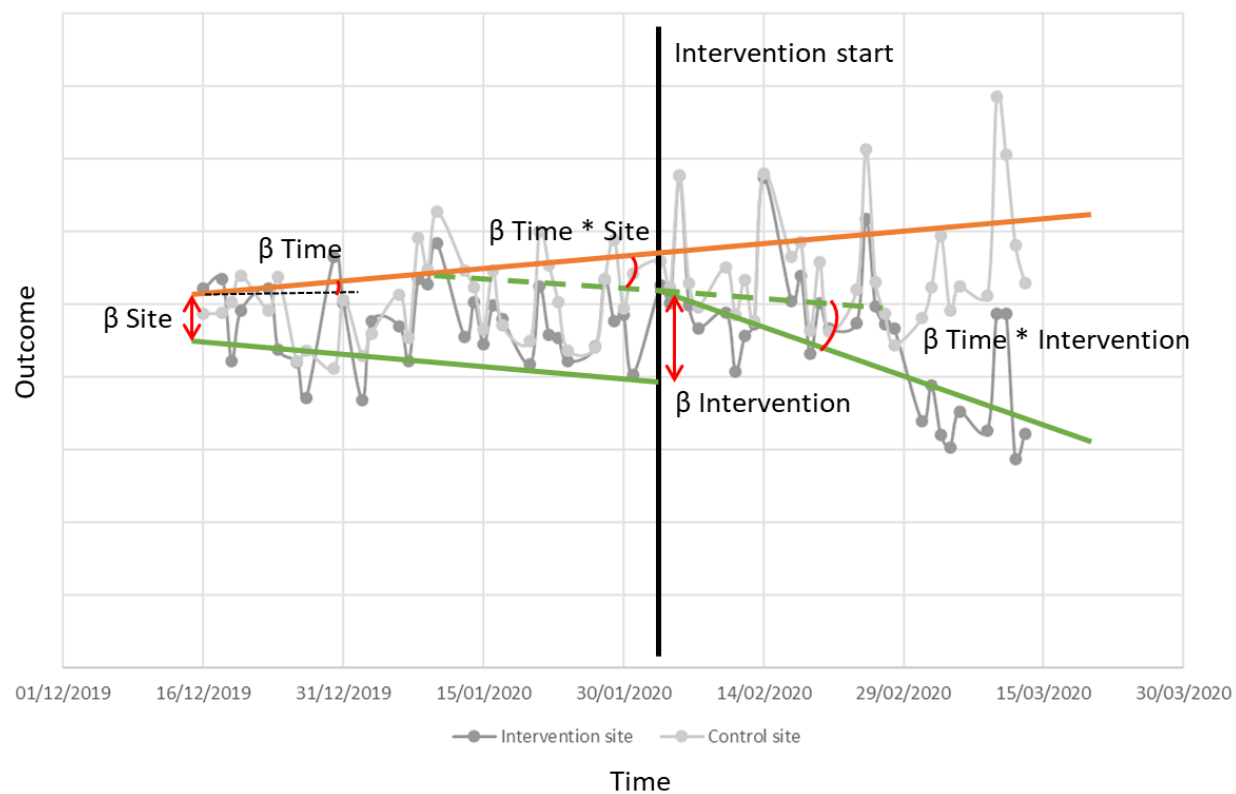

Table S2 Mean nutritional quality of means and nutrient intakes per meal according to the period of the study and intervention and control sites in the Nutri-Score catering trial – difference in difference analysis for participants with at least one meal in each study period

|                                    | Intervention site |                 | Control site    |                 | Difference<br>before/after<br>intervention<br>site | Difference<br>before/after<br>control site | <i>p</i> DID <sup>2</sup> |
|------------------------------------|-------------------|-----------------|-----------------|-----------------|----------------------------------------------------|--------------------------------------------|---------------------------|
|                                    | Before            | After           | Before          | After           |                                                    |                                            |                           |
| N                                  | 951               | 951             | 643             | 643             |                                                    |                                            |                           |
| FSAm/HCSP of the meal <sup>1</sup> | 1.95 ± 2.14       | 1.71 ± 2.06     | 1.98 ± 2.02     | 2.02 ± 1.90     | 0.001                                              | 0.57                                       | 0.008                     |
| Energy (Kcal/meal)                 | 815.40 ± 163.97   | 747.87 ± 158.17 | 852.23 ± 175.16 | 834.14 ± 170.30 | <0.0001                                            | 0.0004                                     | <0.0001                   |
| Sugars (g/meal)                    | 23.83 ± 9.59      | 23.39 ± 9.34    | 25.56 ± 11.03   | 27.88 ± 11.68   | 0.12                                               | <0.0001                                    | <0.0001                   |
| Saturated fat (g/meal)             | 11.26 ± 4.13      | 10.01 ± 3.51    | 11.50 ± 3.98    | 11.35 ± 3.69    | <0.0001                                            | 0.23                                       | <0.0001                   |
| Salt (g/meal)                      | 3.70 ± 1.32       | 3.28 ± 1.10     | 3.92 ± 1.41     | 3.56 ± 1.06     | <0.0001                                            | <0.0001                                    | 0.48                      |
| Proteins (g/meal)                  | 36.46 ± 9.73      | 34.32 ± 8.34    | 38.32 ± 9.80    | 36.79 ± 8.95    | <0.0001                                            | <0.0001                                    | 0.13                      |
| Fibers (g/meal)                    | 10.13 ± 3.02      | 9.15 ± 2.83     | 10.61 ± 2.83    | 9.95 ± 2.42     | <0.0001                                            | <0.0001                                    | 0.02                      |

Numbers are mean ±SD

<sup>1</sup>FSAm/HCSP is the nutrient profiling model underpinning the Nutri-Score and correspond to the overall nutritional quality of the meal (qualitative assessment). It was calculated using the energy-weighted mean of foods composing each meal

<sup>2</sup>Difference in difference analyses were carried out using unadjusted generalized linear models

Table S3 Impact of the Nutri-Score on the overall nutritional quality of meals and nutrient intakes over time – sensitivity analysis with no adjustment on the average nutrient composition of the daily offer. Nutri-Score catering trial

|                                          | $\beta$ | IC 95%           | P       |
|------------------------------------------|---------|------------------|---------|
| <b>FSAm/HCSP<sup>1</sup> of the meal</b> |         |                  |         |
| Site                                     | 0.46    | 0.21 ; 0.7       | 0.0003  |
| Time                                     | 0       | -0.002 ; 0.002   | 0.93    |
| Time*site                                | -0.017  | -0.023 ; -0.012  | <0.0001 |
| Intervention period                      | -3.83   | -4.25 ; -3.41    | <0.0001 |
| Intervention period*time                 | 0.06    | 0.05 ; 0.07      | <0.0001 |
| <b>Calories (g/meal)</b>                 |         |                  |         |
| Site                                     | -82.38  | -101.31 ; -63.46 | <0.0001 |
| Time                                     | 0.04    | -0.11 ; 0.19     | 0.60    |
| Time*site                                | 1.95    | 1.57 ; 2.33      | <0.0001 |
| Intervention period                      | 357.44  | 328.88 ; 385.99  | <0.0001 |
| Intervention period*time                 | -7.35   | -7.86 ; -6.84    | <0.0001 |
| <b>Sugars (g/meal)</b>                   |         |                  |         |
| Site                                     | 0.69    | -0.42 ; 1.81     | 0.22    |
| Time                                     | 0.054   | 0.046 ; 0.063    | <0.0001 |
| Time*site                                | -0.08   | -0.1 ; -0.06     | <0.0001 |
| Intervention period                      | 15.54   | 13.95 ; 17.12    | <0.0001 |
| Intervention period*time                 | -0.22   | -0.25 ; -0.19    | <0.0001 |
| <b>Saturated fats (g/meal)</b>           |         |                  |         |
| Site                                     | -1.18   | -1.63 ; -0.73    | <0.0001 |
| Time                                     | -0.003  | -0.007 ; 0.001   | 0.13    |
| Time*site                                | 0.03    | 0.02 ; 0.04      | <0.0001 |
| Intervention period                      | 6.13    | 5.4 ; 6.85       | <0.0001 |
| Intervention period*time                 | -0.13   | -0.14 ; -0.11    | <0.0001 |
| <b>Salt (g/meal)</b>                     |         |                  |         |
| Site                                     | 0       | -0.15 ; 0.15     | 0.98    |
| Time                                     | -0.004  | -0.005 ; -0.002  | <0.0001 |
| Time*site                                | -0.006  | -0.009 ; -0.002  | 0.0009  |
| Intervention period                      | -0.68   | -0.94 ; -0.42    | <0.0001 |
| Intervention period*time                 | 0.01    | 0.005 ; 0.014    | <0.0001 |
| <b>Proteins (g/meal)</b>                 |         |                  |         |
| Site                                     | -3.92   | -4.94 ; -2.9     | <0.0001 |
| Time                                     | -0.02   | -0.03 ; -0.01    | <0.0001 |
| Time*site                                | 0.08    | 0.06 ; 0.1       | <0.0001 |
| Intervention period                      | 12.97   | 11.46 ; 14.47    | <0.0001 |
| Intervention period*time                 | -0.25   | -0.28 ; -0.23    | <0.0001 |
| <b>Fibres (g/meal)</b>                   |         |                  |         |
| Site                                     | -1.33   | -1.65 ; -1.02    | <0.0001 |
| Time                                     | -0.002  | -0.005 ; 0.001   | 0.19    |
| Time*site                                | 0.04    | 0.03 ; 0.05      | <0.0001 |
| Intervention period                      | 6.15    | 5.65 ; 6.65      | <0.0001 |
| Intervention period*time                 | -0.13   | -0.13 ; -0.12    | <0.0001 |

$\beta$  obtained from mixed effects models.

The models included fixed effects for time (accounting for an overall seasonal trend in food choices), site (accounting for differences in food choices between control and intervention sites throughout the study period) and interaction between time and site (site\*time, accounting for differing seasonal trends in food choices over time between control and intervention sites). The effect of the intervention was modelled as a fixed effect for the intervention period (accounting for an immediate effect of the intervention) and an interaction between time and the intervention period (intervention period\*time accounting for a modified trend over time after the intervention started).

<sup>1</sup>FSAm/HCSP is the nutrient profiling model underpinning the Nutri-Score and correspond to the overall nutritional quality of the meal (qualitative assessment)

Table S4 Impact of the Nutri-Score on the overall nutritional quality of meals and nutrient intakes over time – sensitivity analysis including only participants with more than five meals over the study (at least one meal in each study period). Nutri-Score catering trial (N=1456)

|                                          | $\beta$ | IC 95%          | P       |
|------------------------------------------|---------|-----------------|---------|
| <b>FSAm/HCSP<sup>1</sup> of the meal</b> |         |                 |         |
| Site                                     | 0.36    | 0.1 ; 0.61      | 0.007   |
| Time                                     | 0.006   | 0.004 ; 0.008   | <0.0001 |
| Time*site                                | -0.012  | -0.018 ; -0.007 | <0.0001 |
| Intervention period                      | -3.34   | -3.76 ; -2.91   | <0.0001 |
| Intervention period*time                 | 0.05    | 0.04 ; 0.06     | <0.0001 |
| <b>Calories (g/meal)</b>                 |         |                 |         |
| Site                                     | -41.89  | -62.02 ; -21.77 | <0.0001 |
| Time                                     | 1.02    | 0.86 ; 1.19     | <0.0001 |
| Time*site                                | 0.2     | -0.19 ; 0.6     | 0.31    |
| Intervention period                      | 355.22  | 326.49 ; 383.94 | <0.0001 |
| Intervention period*time                 | -6.03   | -6.55 ; -5.51   | <0.0001 |
| <b>Sugars (g/meal)</b>                   |         |                 |         |
| Site                                     | 0.68    | -0.51 ; 1.87    | 0.27    |
| Time                                     | 0.03    | 0.02 ; 0.04     | <0.0001 |
| Time*site                                | -0.08   | -0.1 ; -0.06    | <0.0001 |
| Intervention period                      | 14.54   | 12.93 ; 16.15   | <0.0001 |
| Intervention period*time                 | -0.21   | -0.23 ; -0.18   | <0.0001 |
| <b>Saturated fats (g/meal)</b>           |         |                 |         |
| Site                                     | -0.4    | -0.87 ; 0.08    | 0.10    |
| Time                                     | 0.017   | 0.013 ; 0.021   | <0.0001 |
| Time*site                                | 0.004   | -0.006 ; 0.014  | 0.41    |
| Intervention period                      | 4.46    | 3.71 ; 5.2      | <0.0001 |
| Intervention period*time                 | -0.08   | -0.1 ; -0.07    | <0.0001 |
| <b>Salt (g/meal)</b>                     |         |                 |         |
| Site                                     | 0.19    | 0.03 ; 0.34     | 0.02    |
| Time                                     | 0.002   | 0.001 ; 0.004   | 0.002   |
| Time*site                                | -0.013  | -0.016 ; -0.009 | <0.0001 |
| Intervention period                      | -0.4    | -0.66 ; -0.14   | 0.002   |
| Intervention period*time                 | 0.011   | 0.006 ; 0.016   | <0.0001 |
| <b>Proteins (g/meal)</b>                 |         |                 |         |
| Site                                     | -3.01   | -4.09 ; -1.92   | <0.0001 |
| Time                                     | 0.02    | 0.01 ; 0.03     | 0.0001  |
| Time*site                                | 0.04    | 0.02 ; 0.06     | 0.0001  |
| Intervention period                      | 14.27   | 12.73 ; 15.8    | <0.0001 |
| Intervention period*time                 | -0.24   | -0.27 ; -0.22   | <0.0001 |
| <b>Fibres (g/meal)</b>                   |         |                 |         |
| Site                                     | -0.58   | -0.9 ; -0.25    | 0.0006  |
| Time                                     | 0.001   | -0.002 ; 0.003  | 0.55    |
| Time*site                                | 0.006   | -0.001 ; 0.012  | 0.11    |
| Intervention period                      | 5.85    | 5.36 ; 6.35     | <0.0001 |
| Intervention period*time                 | -0.096  | -0.105 ; -0.087 | <0.0001 |

$\beta$  obtained from mixed effects models, adjusted for the average nutrient composition for each day. The models included fixed effects for time (accounting for an overall seasonal trend in food choices), site (accounting for differences in food choices between control and intervention sites throughout the study period) and interaction between time and site (site\*time, accounting for differing seasonal trends in food choices over time between control and intervention sites). The effect of the intervention was modelled as a fixed effect for the intervention period (accounting for an immediate effect of the intervention) and an interaction between time and the intervention period (intervention period\*time accounting for a modified trend over time after the intervention started).

<sup>1</sup>FSAm/HCSP is the nutrient profiling model underpinning the Nutri-Score and correspond to the overall nutritional quality of the meal (qualitative assessment)

*Table S5 Results from the complementary voluntary online survey administered after trial termination. N=72*

|                                                                                                  |    |      |
|--------------------------------------------------------------------------------------------------|----|------|
| Are familiar with the Nutri-Score (have already heard or seen the Nutri-Score - unprompted) N=72 |    |      |
| Yes                                                                                              | 57 | 79.2 |
| No                                                                                               | 10 | 13.9 |
| Not sure                                                                                         | 5  | 6.9  |
| Have noticed the Nutri-Score during the study period N=67                                        |    |      |
| Yes                                                                                              | 43 | 64.2 |
| No                                                                                               | 17 | 25.4 |
| Not sure                                                                                         | 7  | 10.4 |
| Have noticed the Nutri-Score on (N=43)                                                           |    |      |
| Shelf display                                                                                    | 33 | 76.7 |
| Menus                                                                                            | 20 | 46.5 |
| Information on tables                                                                            | 16 | 37.2 |
| Displays in the restaurant (poster or screen displays)                                           | 9  | 20.9 |
| Consider that Nutri-Score influenced their food choices N=67                                     |    |      |
| Yes, often                                                                                       | 11 | 16.4 |
| Yes, sometimes                                                                                   | 29 | 43.3 |
| Yes, a little                                                                                    | 1  | 1.5  |
| No                                                                                               | 26 | 38.8 |
| Already knew how to use Nutri-Score before it was implemented in the staff restaurant N=72       |    |      |
| Agree                                                                                            | 56 | 77.8 |
| Disagree                                                                                         | 16 | 22.2 |
| Would like for Nutri-Score to be maintained in the staff cafeteria N=72                          |    |      |
| Agree                                                                                            | 68 | 94.4 |
| Disagree                                                                                         | 4  | 5.6  |
| Results presented are numbers and percentages                                                    |    |      |
